# Supplementary material for: Students’ approaches to medical school choice: relationship with students’ characteristics and motivation
Source: PubMed Central journal article supplement (PMC5511747; doi:10.5116/ijme.5921.5090), 2017-06-12
Supplement: ijme-8-217-S1.pdf [file ijme-8-217-S1.pdf]

## Appendix

Pearson correlations between reasons for medical school choice and motivation outcomes

| Year-1                       | 1 Reason City | 2 Reason Curriculum | 3 Reason University culture | 4 Reason Selection procedure | 5 Autonomous motivation | 6 Controlled motivation | 7 Strength of motivation | 8 Willingness to sacrifice | 9 Readiness to start | 10 Persistence |
|------------------------------|---------------|---------------------|-----------------------------|------------------------------|-------------------------|-------------------------|--------------------------|----------------------------|----------------------|----------------|
| Year-4                       |               |                     |                             |                              |                         |                         |                          |                            |                      |                |
| 1 Reason City                | -             | n/a                 | n/a                         | n/a                          | -0.085                  | -0.058                  | <b>-0.140*</b>           | <b>-0.185**</b>            | -0.092               | -0.078         |
| 2 Reason Curriculum          | n/a           | -                   | n/a                         | n/a                          | 0.067                   | -0.091                  | <b>0.132*</b>            | <b>0.141*</b>              | 0.067                | <b>0.137*</b>  |
| 3 Reason University culture  | n/a           | n/a                 | -                           | n/a                          | -0.071                  | 0.078                   | -0.046                   | -0.017                     | -0.022               | -0.045         |
| 4 Reason Selection procedure | n/a           | n/a                 | n/a                         | -                            | 0.069                   | 0.067                   | 0.063                    | 0.079                      | 0.049                | 0.006          |
| 5 Autonomous motivation      | -0.048        | 0.123               | 0.052                       | -0.058                       | -                       | -0.017                  | <b>0.572**</b>           | <b>0.459**</b>             | <b>0.524**</b>       | <b>0.395**</b> |
| 6 Controlled motivation      | -0.075        | -0.086              | -0.125                      | <b>0.184*</b>                | -0.042                  | -                       | -0.055                   | -0.076                     | -0.007               | -0.047         |
| 7 Strength of motivation     | 0.000         | -0.022              | 0.081                       | -0.018                       | <b>0.407**</b>          | -0.100                  | -                        | <b>0.846**</b>             | <b>0.820**</b>       | <b>0.746**</b> |
| 8 Willingness to sacrifice   | 0.036         | -0.003              | <b>0.185*</b>               | -0.112                       | <b>0.247**</b>          | -0.067                  | <b>0.745**</b>           | -                          | <b>0.547**</b>       | <b>0.497**</b> |
| 9 Readiness to start         | -0.094        | -0.012              | 0.019                       | 0.091                        | <b>0.386**</b>          | -0.072                  | <b>0.752**</b>           | <b>0.281**</b>             | -                    | <b>0.374*</b>  |
| 10 Persistence               | 0.069         | -0.027              | 0.029                       | -0.061                       | <b>0.222**</b>          | -0.108                  | <b>0.700**</b>           | <b>0.390**</b>             | <b>0.254**</b>       | -              |

\*\*Correlation is significant at the 0.01 level (2-tailed)

\*Correlation is significant at the 0.05 level (2-tailed)

Blue cells represent Year-1 correlations and white cells represent Year-4 correlations

n/a = not available
